# Supplementary material for: Succinate Dehydrogenase Subunit C Contributes to Mycelial Growth and Development, Stress Response, and Virulence in the Insect Parasitic Fungus Beauveria bassiana
Source: PubMed Central journal article supplement (PMC9602434; doi:10.1128/spectrum.02891-22), 2022-08-16
Supplement: spectrum.02891-22-s0001.pdf [file spectrum.02891-22-s0001.pdf]

**Table S1 Primers used in this study.**

| Primers                          | Paired sequences (5'–3')*                                                                                                                                   | Purpose                                                      |
|----------------------------------|-------------------------------------------------------------------------------------------------------------------------------------------------------------|--------------------------------------------------------------|
| P1/P2                            | <u>ACGAGCTGTACAAGTAACCCGGAAGTAAAGCCG</u><br>AAGAGTG/<br><u>CTCGGTACCAAGCTTGGCTGCAGTTTGTCTTGGG</u><br>TATGGG                                                 | Amplifying 5'-fragment of <i>BbSdhC1</i>                     |
| P3/P4                            | <u>ACCCATGGCTCGAGTCTAGACTGTCTGGCGTGGC</u><br>GTAT / <u>GTGGCTAGCGTTAACTAGT</u><br>TCCGAGAATGAAGTCCGC                                                        | Amplifying 3'-fragment of <i>BbSdhC1</i>                     |
| P5/P6                            | <u>ATCCGTCGACCTGCAGCCAAGCTTTCGAGTAAG</u><br>TAATGCTTTCTATG /<br><u>ACACTAGTCAGATCTTCTAGTGTCCATAACGGAA</u><br>CGACTACAATA                                    | Cloning the <i>BbSdhC1</i> full ORF for gene complementation |
| P7/P8                            | GCATCGTGTCCACCTACC /<br>AAGCCCCTTTCGCTCCAT                                                                                                                  | Screening transformants                                      |
| P9/P10                           | TCGGTCGTATGATAGGATGATTT/TTAACGTGCAT<br>AGCGAGTGGAAC                                                                                                         | Preparing <i>BbSdhC1</i> probe                               |
| P11/P12                          | <u>AAGCTTGAATTCGAGCTCGGTAATCTCGCTCGGCT</u><br>GTCCT /<br><u>ACACTAGTCAGATCTTCTAGTGTGCTTGTAGTTCG</u><br>CATTCC<br><u>TGGGCCCGGCGCGCCGAATTC</u> CCCCCTTACAACA | Amplifying the promoter of <i>BbSdhC1</i> for Y1H test       |
| PL <sub>BbSdhC1</sub><br>F/R     | ACCAT/<br><u>TGGCTGCAGGTCGACGGATCCTTGATAGCCTGGT</u><br>CCTGA                                                                                                | Amplifying <i>BbSdhC1</i> cDNA                               |
| P<br>BbSdhC2 <sup>F</sup> /<br>R | <u>GACCCATGGCTCGAGTCTAGAGCACCGACCTCGC</u><br>TGAAA/<br><u>GTGGCTAGCGTTAACTAGTGTCCGTCGCCATCC</u><br>TCTT                                                     | Amplifying <i>BbSdhC2</i> cDNA                               |
| P13/P14                          | TCAGGCGTCTCCGTCTTGAG/CAGTGATGAGCAGA<br>TGGA                                                                                                                 | qRT-PCR for <i>BbSdhC1</i>                                   |
| ActinF/<br>R                     | GGCAACATTGTCATGTCTGG/TTTGCTGGAAGGTG<br>GATAGG                                                                                                               | Reference in qRT-PCR                                         |

\*: The underlined region is required for homologous recombination during plasmid construction.

**Fig. S1 Sequence alignment of the SdhC homologs.** Multiple sequence alignment was performed by ClustalW software. Abbreviations for fungal species are shown as follows, Sc: *Saccharomyces cerevisiae* S288C; Ca: *Candida albicans* 12C; Sp: *Schizosaccharomyces pombe*; Af: *Aspergillus fumigatus* Af293; Po: *Pyricularia oryzae* Y34; Nc: *Neurospora crassa* OR74A; Bb: *Beauveria bassiana* ARSEF 2860; Cm: *Cordyceps militaris* CM01; Bbr: *Beauveria brongniartii* RCEF 3172; Mr: *Metarhizium robertsii* ARSEF 23; Ma: *Metarhizium acridum* CQMa 102.

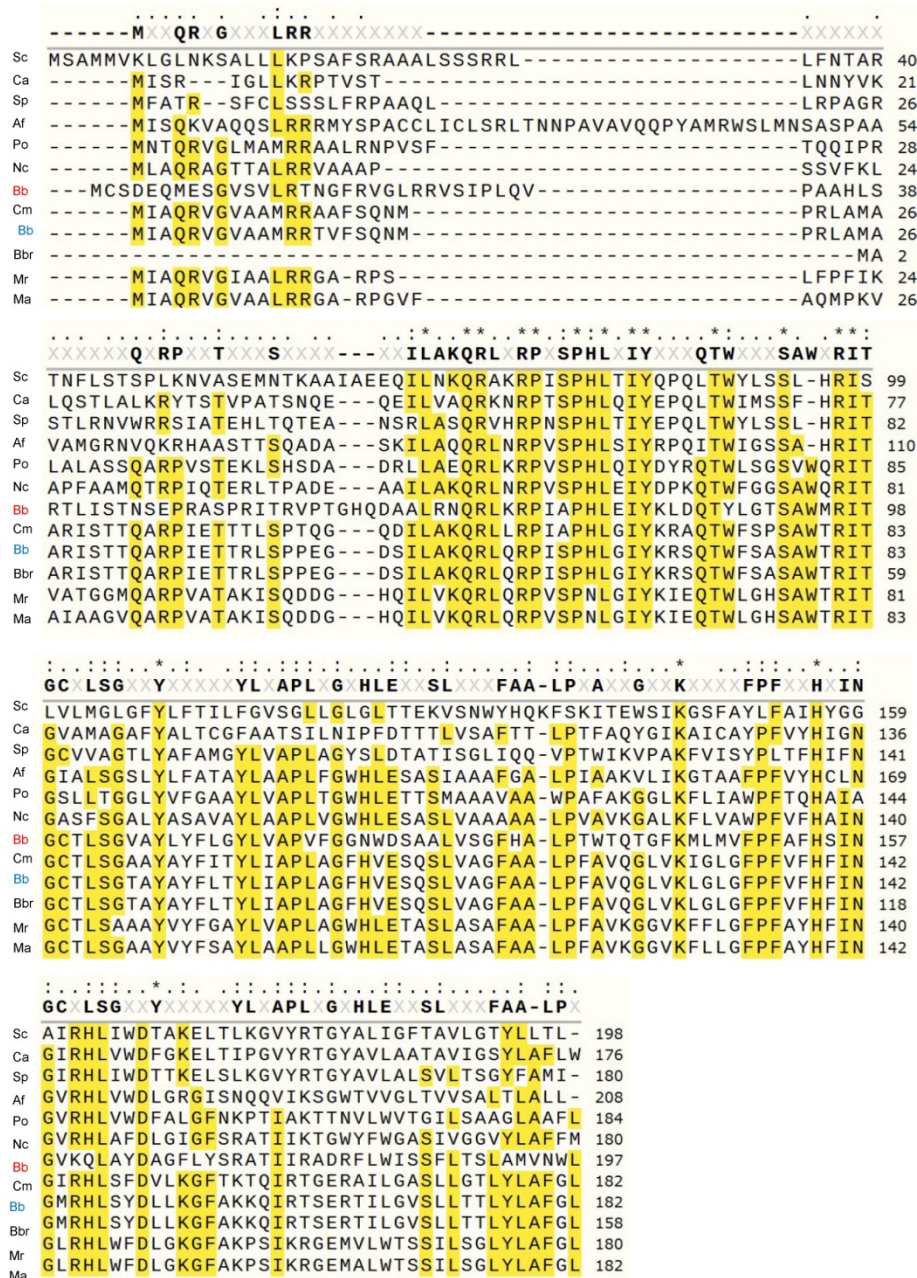

**Fig.S2 Gene disruption and complementation in *B. bassiana***

(A) Schematic diagram deciphering the homologous recombination for gene disruption in fungal genome. The correct gene disruption and complemented mutants were screened by PCR reaction (B) and further confirmed by Southern blotting (C). In panel (B), lane 1, 2 and 3 are the wild-type,  $\Delta Bbsdhc1$ , and complementation stains. Lane M: DNA marker. In panel (C), lane 1, 2 and 3 are the  $\Delta Bbsdhc1$ , wild-type, and complementation stains. The electrophoretic positions and sizes of the DNA bands are indicated.

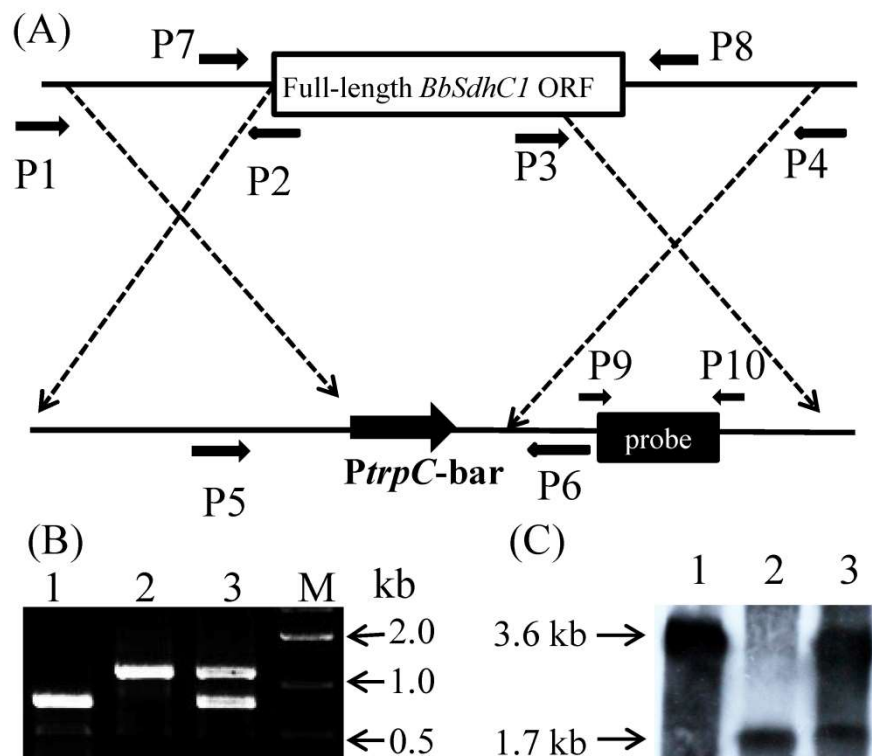

**Fig. S3 ROS content in aerial mycelia of *B. bassiana***

(A) After cultured on SDAY medium for 4 days, the hyphae of  $\Delta Bbsdhc1$  mutant, the wild-type and complemented strain were collected and stained with DHE. Green fluorescence signals of each strain were observed under laser scanning confocal microscope. (B) The fluorescence intensity among strains was subjected to Mann-Whitney analysis and significance (indicated with an asterisk) was determined when p value is less than 0.05.

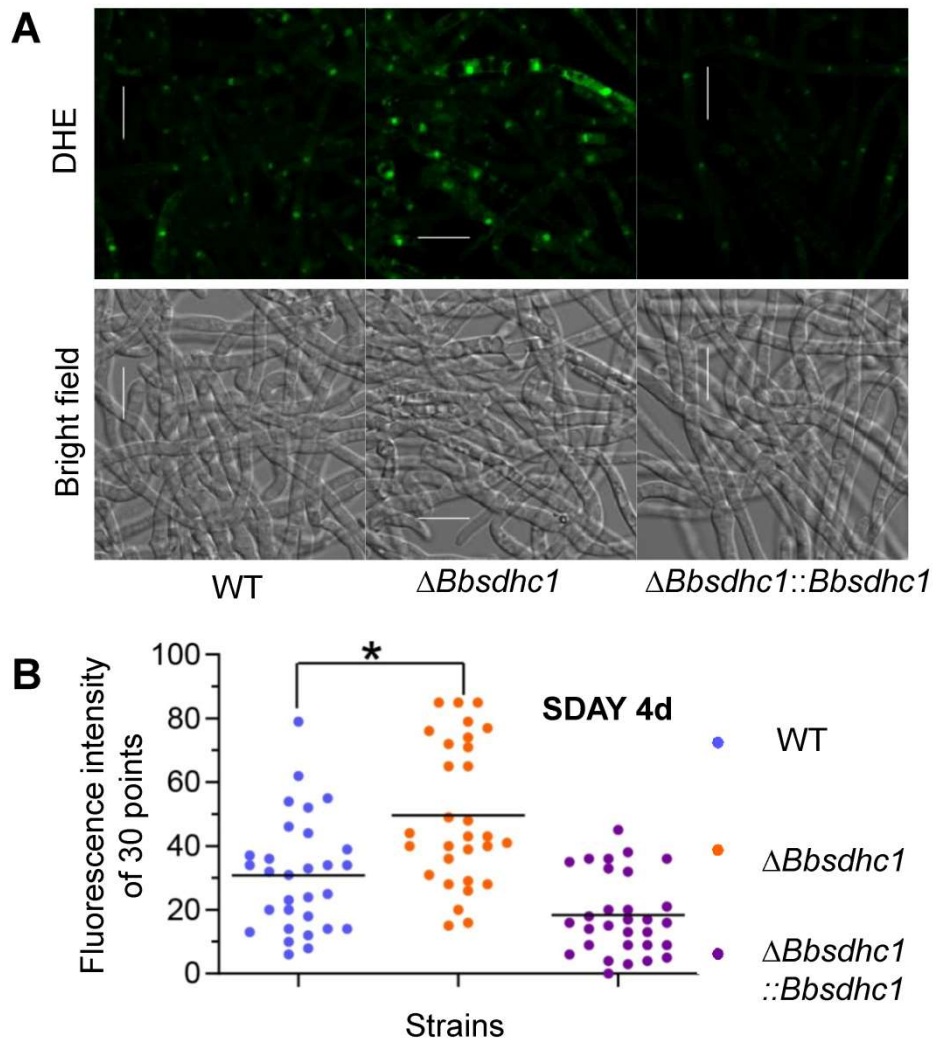

**Fig. S4 Analyses of the promoter region of *BbSdhC1*.** No typical *MluI* sites in the promoter of *BbSdhC1*, but the similar sites are present.

ATCTCGCTCGGCTGTCCTGGCCGTCCAAGCTGCGACTTCTTTCAAACCCCTCCATCTGCTCTGGCGGGC  
GTGACGCAGGCTGCAGTGGCGTGTGGACTGGACCAGGCGCCACAGCATTGACGCGAATGCCCTTTGG  
AAGCAGCTGTTTTGCCAAGGACCTAGTGAAGGACGTGATGGCACCCCTTTGTGGCCGAATAGTCTACCAT  
TGCGGCAGTTCCTCTAAACGCGAACCGTTCGATGTGGTGTGATTATGCTGTGATGACCATGTCAGCAGAT  
GGCTTCAGTGAGGGATCCGGCATCATGGTCACGTACGATCCACCTCGTTGCATGTGAGGCAGAGCATA  
TTTCGTAATGGCAAACATTTGCAAAATGTTGCTCCTGAATGTGCTCTCAACATCGTCGAGGTTTATTTCA  
GCGAGGTCGGTGCACATGATTTGCTTGGATGCGTTGTTGACCAGTGTGTGAATGACACCAAACCTCCTCG  
ACATGCTTTTCGACAGCCTGGAGACAGGTTTTGTTGTCCATTAGATCACCCGCAACCAAGAGGCACCTTTC  
CGCCCTCCTTTCCACCATTTCTTCGTATCGTTGGCGTCTTGCTCCTCCTCTGGCAGGTACACAATCGTC  
ACGTCGGAGCCTTCTCTGGCAAACAAGACGGCAATTGAGCGACCGATGCCAGAGCTGTAAAGTCAATC  
AATAATTGCTAACCCAGAACGAGCAAGGGGAAGAACTGAGCTACTCACTCGCCACCTGTAATGAGAG  
CCTTGTTCCTTTCAATTTGCCCGCAGCAAGATATTCATGGTGTCTTTGCCCTCGAGCTTAGTAGA  
CTCGCTGGACGGCGCCATGTCCCTTCGGACCTAGAAAAAAAAAACAGTTAGTGTGCTGCTCTCATGT  
ATGCATCGTGTCCACCTACC CGGGGAGATTCTGGGCTTGAGCCTGAGGAACAGGCTTGAAGCCACCAC  
CTTCGGACTTGGACATGGAGAATGGTACGATAGAAAAATAGCGTGAATAATTCTTGATGAGAATTGA  
GTGTGTAACCCGGCACGGAAATTGCAAATTGATAGCCTGGTCCTGATGTGACTAGCTGGGAGTTTGAT  
GAGATTGATACGTGATGGGTGCATGGCGGGCTTTTGTAGTAGACTGAGCAGACCTGGCCCATACCCAA  
GACAAACAGTTTTATCCTGATTTTAACAAGTCAAATAGGCCAATGAATTCAGGGAATGCGAACTACAAG  
C
